# Supplementary material for: Effect of probiotic Bifidobacterium bifidum G9-1 on the relationship between gut microbiota profile and stress sensitivity in maternally separated rats
Source: PubMed Central journal article supplement (PMC6098190; doi:10.1038/s41598-018-30943-3), 2018-08-17
Supplement: 41598_2018_30943_MOESM1_ESM.pdf [file 41598_2018_30943_MOESM1_ESM.pdf]

## **Supplementary figures**

**Effect of probiotic *Bifidobacterium bifidum* G9-1 on the relationship between gut microbiota profile and stress sensitivity in maternally separated rats**

Hirokazu Fukui, Tadayuki Oshima, Yoshiki Tanaka, Yosuke Oikawa, Yutaka Makizaki,

Hiroshi Ohno, Toshihiko Tomita, Jiro Watari, Hiroto Miwa.

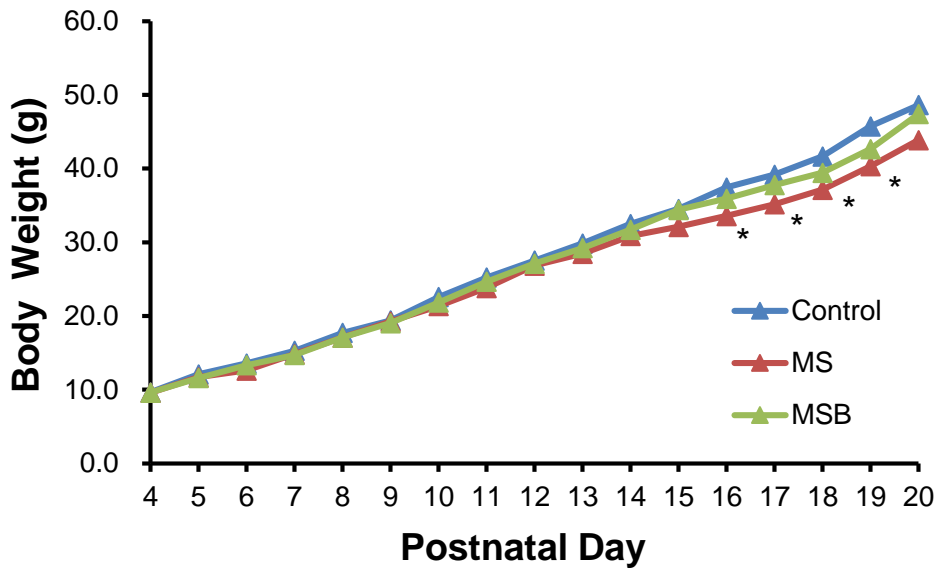

**Supplementary Figure 1. Effect of BBG9-1 on body growth in female MS rats.** Results are expressed as the mean  $\pm$  SE (n = 6 female rats per group). Significantly smaller than in the control at the same time point: \* $P < 0.05$  (Steel-Dwass test).
